# Supplementary material
Source: publisher figshare collection journal article supplement (https://asha.figshare.com/articles/dataset/_/16821283)
Supplement: Supplementary file 1 [file 1]

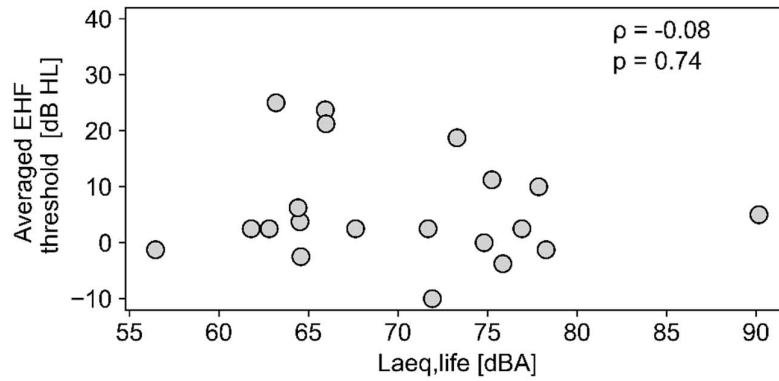

**Supplemental Material S2.** Spearman's correlation analysis between Laeq,life and averaged EHF audiometric thresholds from 10 to 16 kHz.
