# Supplementary material
Source: publisher figshare collection journal article supplement (https://asha.figshare.com/articles/dataset/_/16821283)
Supplement: Supplementary file 2 [file 1]

**Supplemental Material S5.** U-values and significance levels of Mann Whitney U test for AEP measurements. Median test shifts from session 1 to session 2, minima and maxima are shown for subjects that have experienced Hearing Related Symptoms (HRS) and those who did not. Significant between-group differences are highlighted with  $^*(p < .05)$ ,  $^{**}(p < .01)$  or  $^{***}(p < .001)$ .

|                  | Stimulus      | no HRS ( $n = 11$ ) |         |         | HRS ( $n = 9$ ) |         |         | Mann-Whitney U |       |
|------------------|---------------|---------------------|---------|---------|-----------------|---------|---------|----------------|-------|
|                  |               | Median              | Minimum | Maximum | Median          | Minimum | Maximum | U              | $p$   |
| latency wave I   | 11 Hz 80 dB   | -0.10               | -0.20   | 0.10    | 0.05            | -0.10   | 0.40    | 78.00          | .03 * |
|                  | 11 Hz 100 dB  | -0.10               | -0.20   | 0.20    | 0.00            | 0.00    | 0.60    | 79.50          | .02 * |
|                  | 120 Hz 80 dB  | 0.00                | -0.30   | 0.20    | 0.15            | -0.70   | 1.20    | 66.00          | .23   |
|                  | 120 Hz 100 dB | 0.10                | -0.30   | 1.20    | -0.05           | -0.70   | 0.20    | 27.50          | .10   |
|                  | TB 1 kHz      | 0.00                | -1.10   | 1.40    | -0.10           | -0.60   | 1.00    | 49.00          | 1.00  |
|                  | TB 4 kHz      | -0.20               | -1.00   | 1.90    | -0.15           | -1.00   | 0.80    | 39.50          | .66   |
| Latency wave III | 11 Hz 80 dB   | 0.10                | -0.10   | 0.80    | 0.15            | -0.10   | 1.00    | 50.50          | .94   |
|                  | 11 Hz 100 dB  | 0.00                | -0.80   | 0.10    | 0.00            | -0.10   | 0.10    | 57.50          | .55   |
|                  | 120 Hz 80 dB  | 0.00                | -0.30   | 1.20    | -0.05           | -0.60   | 0.20    | 35.00          | .30   |
|                  | 120 Hz 100 dB | 0.00                | -0.80   | 0.20    | 0.05            | -0.20   | 0.70    | 72.00          | .10   |
|                  | TB 1 kHz      | 0.10                | -0.70   | 1.50    | 0.20            | -1.20   | 0.70    | 48.00          | .94   |
|                  | TB 4 kHz      | 0.20                | -0.40   | 1.30    | 0.00            | -0.70   | 0.40    | 16.50          | .02*  |
| Latency wave V   | 11 Hz 80 dB   | -0.10               | -0.20   | 0.10    | 0.00            | -0.10   | 1.40    | 73.00          | .08   |
|                  | 11 Hz 100 dB  | 0.00                | -0.10   | 0.40    | 0.05            | -1.30   | 0.20    | 53.00          | .82   |
|                  | 120 Hz 80 dB  | 0.00                | -0.10   | 0.40    | -0.05           | -0.50   | 1.10    | 46.50          | .82   |
|                  | 120 Hz 100 dB | -0.10               | -0.20   | 0.70    | 0.10            | -0.10   | 1.10    | 73.00          | .08   |
|                  | TB 1 kHz      | 0.10                | -0.40   | 1.40    | -0.05           | -0.60   | 0.10    | 29.00          | .13   |
|                  | TB 4 kHz      | 0.05                | -0.50   | 2.00    | -0.10           | -0.20   | 0.40    | 32.00          | .32   |
| Amplitude wave I | 11 Hz 80 dB   | -0.01               | -0.12   | 0.07    | 0.01            | -0.05   | 0.11    | 52.00          | .88   |
|                  | 11 Hz 100 dB  | 0.01                | -0.15   | 0.13    | 0.03            | -0.20   | 0.20    | 56.00          | .66   |
|                  | 120 Hz 80 dB  | 0.02                | -0.08   | 0.17    | -0.00           | -0.18   | 0.17    | 45.00          | .77   |
|                  | 120 Hz 100 dB | 0.02                | -0.08   | 0.10    | -0.02           | -0.13   | 0.08    | 31.00          | .18   |
|                  | TB 1 kHz      | -0.01               | -0.08   | 0.24    | -0.06           | -0.12   | 0.23    | 35.00          | .30   |
|                  | TB 4 kHz      | -0.01               | -0.07   | 0.04    | 0.06            | -0.05   | 0.16    | 71.00          | .04*  |
|                  | 11 Hz 80 dB   | 0.02                | -0.04   | 0.13    | 0.01            | -0.10   | 0.05    | 32.00          | .20   |

|                           |                  |       |       |       |       |       |       |       |      |
|---------------------------|------------------|-------|-------|-------|-------|-------|-------|-------|------|
| Amplitude<br>wave III     | 11 Hz<br>100 dB  | -0.04 | -0.13 | 0.14  | -0.03 | -0.13 | 0.16  | 55.00 | .71  |
|                           | 120 Hz<br>80 dB  | -0.01 | -0.46 | 0.13  | -0.03 | -0.28 | 0.14  | 55.00 | 1.00 |
|                           | 120 Hz<br>100 dB | -0.00 | -0.29 | 0.10  | -0.03 | -0.24 | 0.10  | 47.00 | .88  |
|                           | TB<br>1 kHz      | -0.03 | -0.17 | 0.08  | 0.03  | -0.04 | 0.24  | 71.00 | .11  |
|                           | TB<br>4 kHz      | -0.02 | -0.15 | 0.10  | 0.03  | -0.08 | 0.12  | 53.00 | .55  |
| Amplitude<br>wave V       | 11 Hz<br>80 dB   | 0.01  | -0.09 | 0.27  | 0.02  | -0.15 | 0.30  | 50.00 | 1.00 |
|                           | 11 Hz<br>100 dB  | 0.06  | -0.15 | 0.15  | 0.01  | -0.04 | 0.23  | 55.00 | .71  |
|                           | 120 Hz<br>80 dB  | 0.01  | -0.15 | 0.19  | 0.11  | -0.15 | 0.22  | 61.00 | .41  |
|                           | 120 Hz<br>100 dB | 0.01  | -0.30 | 0.15  | 0.02  | -0.09 | 0.27  | 65.00 | .26  |
|                           | TB<br>1 kHz      | 0.01  | -0.08 | 0.06  | -0.00 | -0.08 | 0.03  | 45.00 | .77  |
|                           | TB<br>4 kHz      | 0.04  | -0.10 | 0.15  | -0.04 | -0.16 | 0.04  | 17.00 | .02* |
| I/V<br>amplitude<br>ratio | 11 Hz<br>80 dB   | -0.04 | -0.67 | 0.40  | -0.04 | -1.01 | 0.42  | 48.00 | .78  |
|                           | 11 Hz<br>100 dB  | 0.08  | -0.54 | 0.45  | 0.11  | -0.95 | 0.39  | 50.00 | .66  |
|                           | 120 Hz<br>80 dB  | 0.08  | -0.55 | 1.00  | -0.01 | -0.95 | 0.25  | 31.00 | .31  |
|                           | 120 Hz<br>100 dB | 0.09  | -0.36 | 8.57  | -0.06 | -0.77 | 0.05  | 17.00 | .03* |
|                           | TB<br>1 kHz      | -0.18 | -4.04 | 63.34 | -0.34 | -1.16 | 3.85  | 35.00 | .49  |
|                           | TB<br>4 kHz      | 0.07  | -0.45 | 16.34 | 0.50  | -0.21 | 13.93 | 50.00 | .41  |
