# Supplementary material
Source: publisher figshare collection journal article supplement (https://asha.figshare.com/articles/dataset/_/16821283)
Supplement: Supplementary file 3 [file 1]

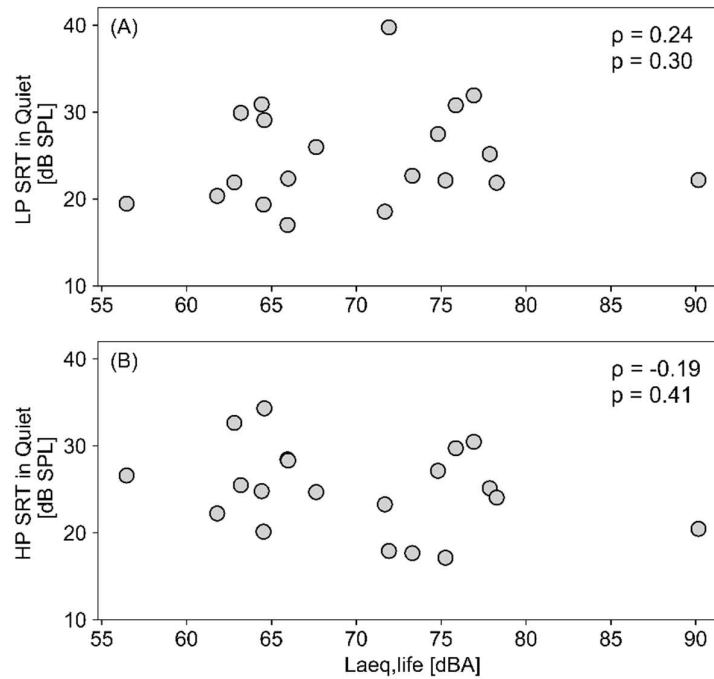

**Supplemental Material S3.** Spearman's correlation analysis between  $L_{aeq,life}$  and (A) LP SPiQ, and (B) HP SPiQ. Correlation coefficients and p-values are indicated in respective panels.
