# Supplementary material
Source: publisher figshare collection journal article supplement (https://asha.figshare.com/articles/dataset/_/16821283)
Supplement: Supplementary file 4 [file 1]

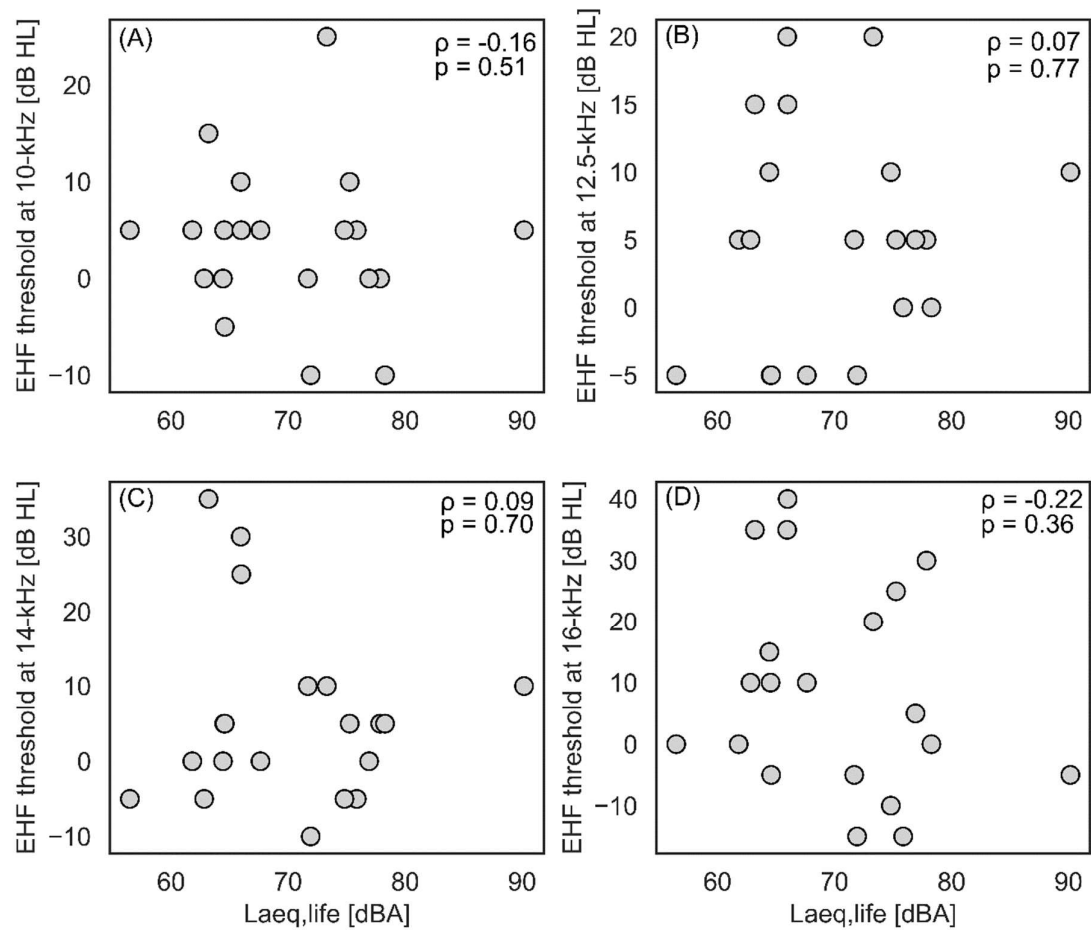

**Supplemental Material S1.** Spearman's correlation analysis between  $L_{\text{aeq,life}}$  and (A) 10 kHz, (B) 12.5 kHz, (C) 14 kHz and (D) 16 kHz EHF thresholds. Correlation coefficients and p-values are indicated in respective panels.
