# Supplementary material
Source: publisher figshare collection journal article supplement (https://asha.figshare.com/articles/dataset/_/16821283)
Supplement: Supplementary file 5 [file 1]

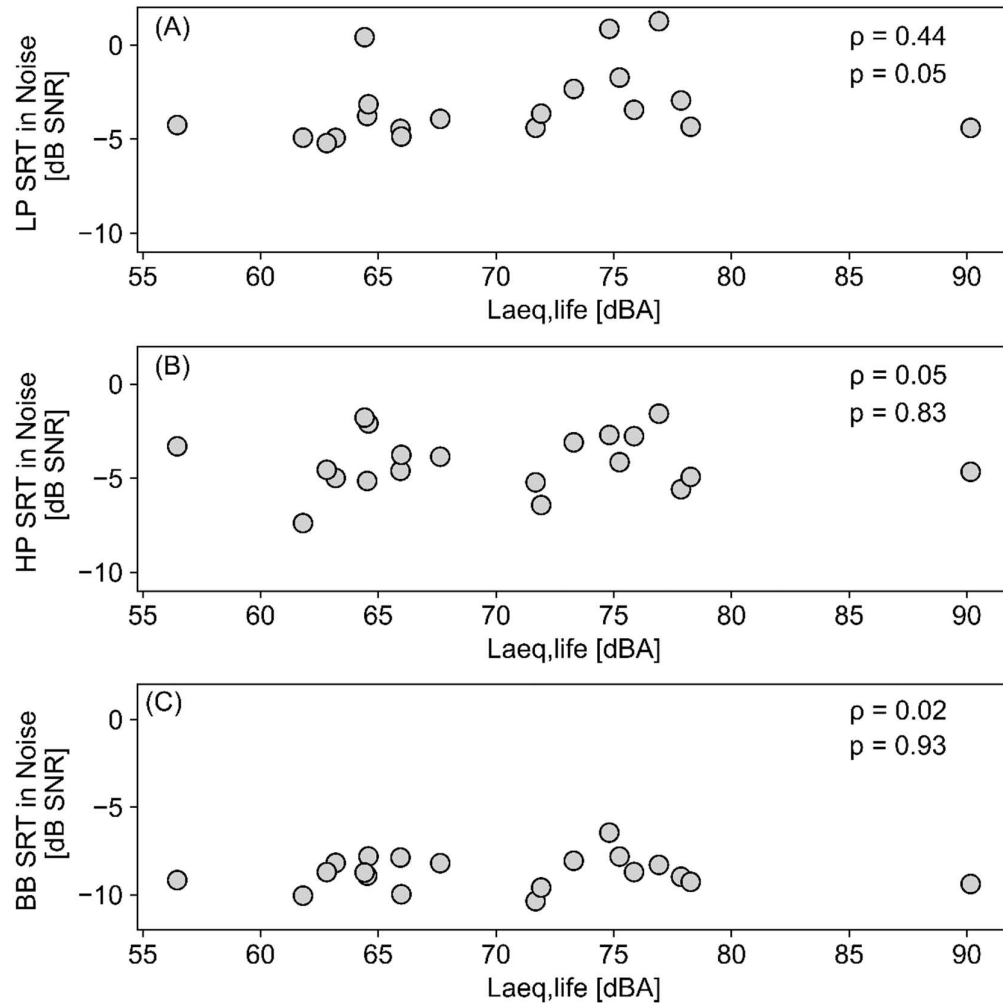

**Supplemental Material S4.** Spearman's correlation analysis between  $L_{aeq,life}$  and (A) LP SPiN, (B) HP SPiN and (C) BB SPiN reception thresholds. Correlation coefficients and p-values are indicated in respective panels.
