# Supplementary material
Source: publisher figshare collection journal article supplement (https://asha.figshare.com/articles/dataset/_/16821283)
Supplement: Supplementary file 6 [file 1]

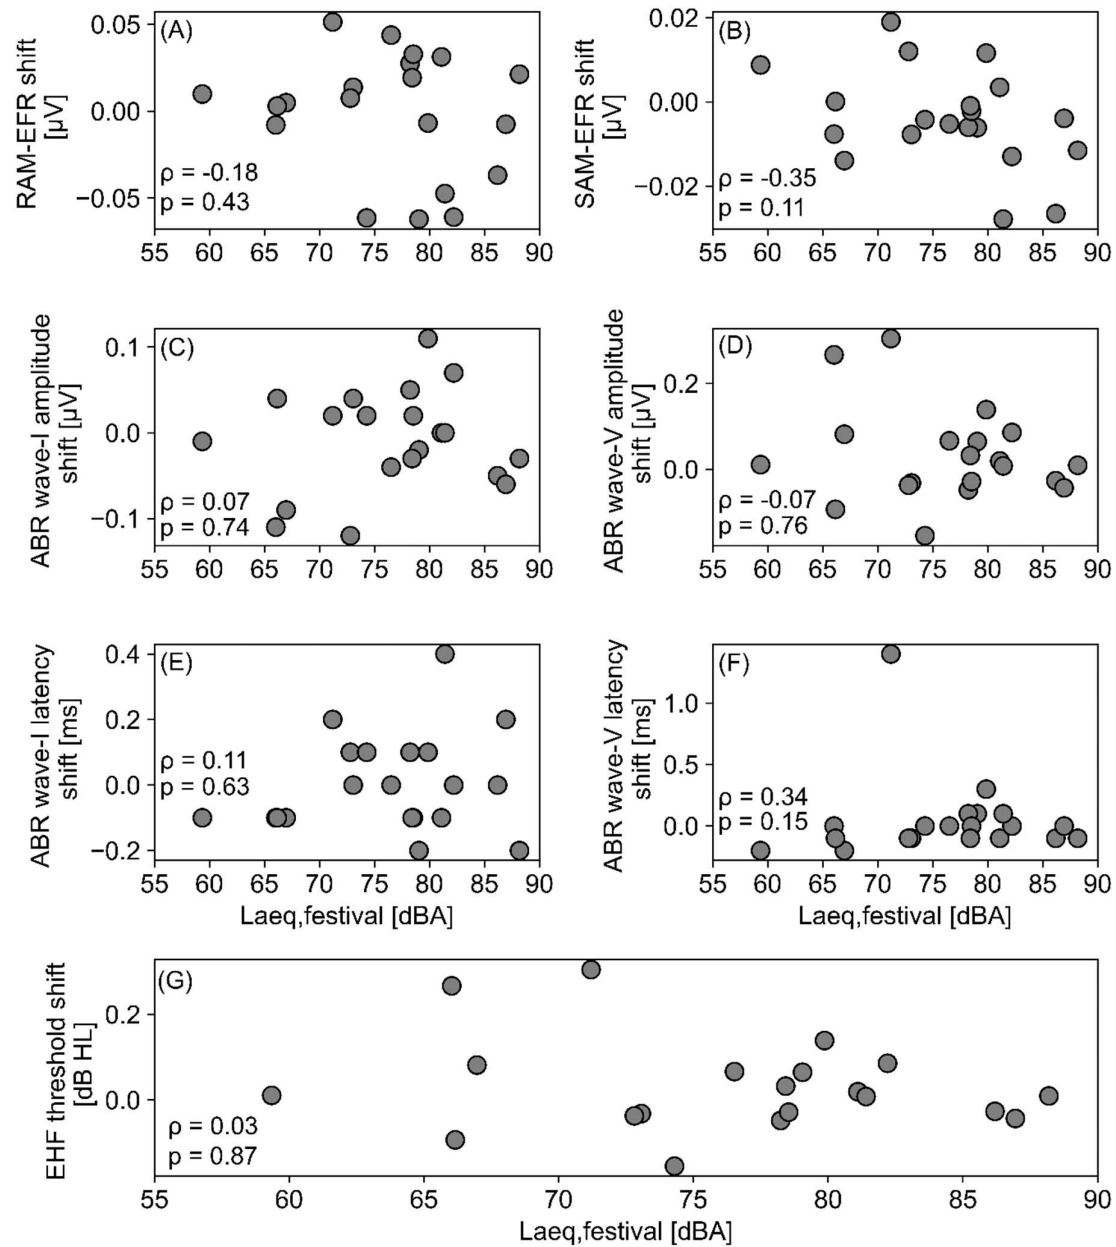

**Supplemental Material S6.** Spearman's correlation between the  $L_{\text{eq,festival}}$  and the shift-amount of different markers from session-1 to session-2: (A) RAM-EFR magnitude, (B) SAM-EFR magnitude, (C) ABR wave-I amplitude, (D) ABR wave-V amplitude, (E) ABR wave-I latency, (F) ABR wave-V latency and (G) EHF threshold shifts. In each panel, a negative shift is an indicator of reduction in the corresponding from session-1 to session-2.
